# Supplementary material
Source: publisher site journal article supplement (https://www.spandidos-publications.com/2451/downloadSupplementary)

Figure S1. Transfection efficiency of H19 siRNA. H19 siRNA effectively knocked down lncRNA H19 expression levels compared with si-NC. #P<0.05 vs. si-NC. H19, H19 imprinted maternally expressed transcript; si, small interfering RNA; lncRNA, long non-coding RNA; NC, negative control.

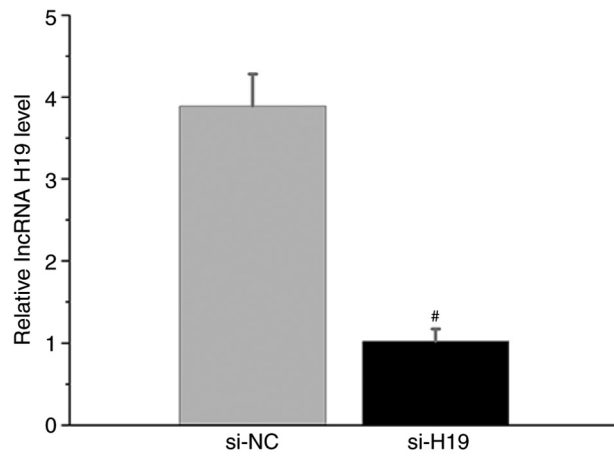

Supplement: Supplementary file 1 [file downloadSupplementary]
